# Supplementary material for: Tin Oxide (SnO2) Nanoparticles: Facile Fabrication, Characterization, and Application in UV Photodetectors
Source: MDPI journal article supplement (doi:10.3390/nano12040632), 2022-02-14
Supplement: s1 [file s1]

# **Tin Oxide Nanoparticles: Facile Fabrication, Characterization and Application in UV Photodetectors**

Zhenping Huang<sup>1</sup>, Jun Zhu<sup>2</sup>, Yi Hu<sup>2</sup>, Yueping Zhu<sup>1</sup>, Guanghua Zhu<sup>2</sup>, Lanping Hu<sup>2</sup>, You Zi<sup>2,\*</sup> and Weichun Huang<sup>2,\*</sup>

<sup>1</sup> Nantong Normal College, Nantong 226010, China; rghzp@163.com (Z.H.); 2015001@ntnc.edu.cn (Y.Z.)

<sup>2</sup> School of Chemistry and Chemical Engineering, Nantong University, Nantong 226019, China; 2007320020@stmail.ntu.edu.cn (J.Z.); 2107320023@stmail.ntu.edu.cn (Y.H.); zgh@ntu.edu.cn (G.Z.); hlp@ntu.edu.cn (L.H.)

\*Correspondence: ziyou@ntu.edu.cn (Y.Z.); huangweichun@ntu.edu.cn (W.H.)

**Table S1** Laser power density ( $P_\lambda$ ) of incident light with various irradiation wavelengths.

| Laser                | $P_\lambda$ (mW cm <sup>-2</sup> ) |          |           |          |         |          |
|----------------------|------------------------------------|----------|-----------|----------|---------|----------|
|                      | Level I                            | Level II | Level III | Level IV | Level V | Level VI |
| Simulated light (SL) | 21.8                               | 47.7     | 156       | 272      | 345     | 449      |
| 300 nm               | 0.15                               | 0.20     | 0.30      | 0.55     | 0.75    | 0.84     |
| 334 nm               | 0.15                               | 0.30     | 0.85      | 1.50     | 1.95    | 2.30     |
| 380 nm               | 0.35                               | 0.55     | 2.10      | 3.60     | 4.74    | 5.95     |
| 420 nm               | 4.25                               | 9.85     | 32.7      | 56.6     | 71.9    | 94.7     |

**Table S2** The comparison of the SnO<sub>2</sub> NP-based PEC electrodes and other published PEC electrodes.

| Materials                         | Experimental conditions                                                                                  | Photocurrent density ( $I$ )/<br>$\mu\text{A cm}^{-2}$ | Response time ( $t_{\text{res}}$ )/ Recovery time ( $t_{\text{rec}}$ ) | Reduction of $I$ after one month | Ref.      |
|-----------------------------------|----------------------------------------------------------------------------------------------------------|--------------------------------------------------------|------------------------------------------------------------------------|----------------------------------|-----------|
| SnO <sub>2</sub> NPs              | 0.05-0.50 M KOH                                                                                          | 14.0                                                   | 2.7 s/3.8 s                                                            | 27.6%                            | This work |
| Black phosphorus Nanosheets (NSs) | 0.05-1.0 M KOH and 0.5 M Na <sub>2</sub> SO <sub>4</sub>                                                 | 0.382                                                  | 0.5 s/1.1 s                                                            | ~82%                             | 1         |
| Te NSs                            | 0.1-1.0 M KOH                                                                                            | 0.365                                                  | -                                                                      | ~24%                             | 2         |
| Se QDs                            | 0.5 M KOH                                                                                                | 1.80                                                   | 0.02 s/0.62 s                                                          | ~48%                             | 3         |
| SnS NSs                           | 0.1-1.0 M Na <sub>2</sub> SO <sub>4</sub> , 0.1-0.5 M H <sub>2</sub> SO <sub>4</sub> , and 0.1-0.5 M KOH | 1.59                                                   | 0.1-0.3 s/0.3-0.5 s                                                    | 45.3%-62.7%                      | 4         |
| Bi quantum dots                   | 0.1-1.0 M KOH and 0.1-0.5 M Na <sub>2</sub> SO <sub>4</sub>                                              | 1.02                                                   | 0.1 s/0.2 s                                                            | 56.7%                            | 5         |

[1] Ren, X.; Li, Z.; Huang, Z.; Sang, D.; Qiao, H.; Qi, X.; Li, J.; Zhong, J.; Zhang, H. Environmentally Robust Black Phosphorus Nanosheets in Solution: Application for Self-Powered Photodetector. *Adv. Funct. Mater.* **2017**, *27*, 1606834.

[2] Xie, Z.; Xing, C.; Huang, W.; Fan, T.; Li, Z.; Zhao, J.; Xiang, Y.; Guo, Z.; Li, J.; Yang, Z.; Dong, B.; Qu, J.; Fan, D.; Zhang, H. Ultrathin 2D Nonlayered Tellurium Nanosheets: Facile Liquid-Phase Exfoliation, Characterization, and Photoresponse with High Performance and Enhanced Stability. *Adv. Funct. Mater.* **2018**, *28*, 1705833.

[3] Jiang, X.; Huang, W.; Wang, R.; Li, H.; Xia, X.; Zhao, X.; Hu, L.; Chen, T.; Tang, Y.; Zhang, H. Photocarrier Relaxation Pathways in Selenium Quantum Dots and Their Application in UV-Vis Photodetection. *Nanoscale* **2020**, *12*, 11232–11241.

[4] Huang, W.; Xie, Z.; Fan, T.; Li, J.; Wang, Y.; Wu, L.; Ma, D.; Li, Z.; Ge, Y.; Huang, Z.N.; Dai, X.; Xiang, Y.; Li, J.; Zhu, X.; Zhang, H. Black-Phosphorus-Analogue Tin Monosulfide: An Emerging Optoelectronic Two-Dimensional Material for High-Performance Photodetection with

Improved Stability under Ambient/Harsh Conditions. *J. Mater. Chem. C* **2018**, 6, 9582–9593.

[5] Xing, C.; Chen, X.; Huang, W.; Song, Y.; Li, J.; Chen, S.; Zhou, Y.; Dong, B.; Fan, D.; Zhu, X.; Zhang, H. Two-Dimensional Lead Monoxide: Facile Liquid Phase Exfoliation, Excellent Photoresponse Performance, and Theoretical Investigation. *ACS Photonics* **2018**, 5, 5055–5067.

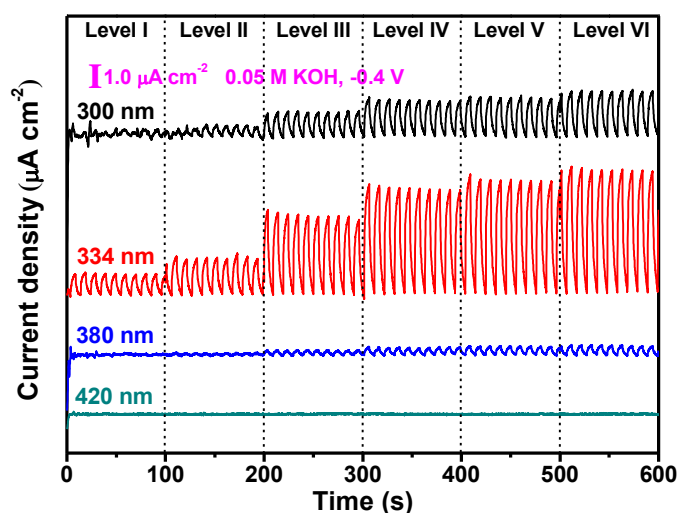

**Figure S1.** The influence of laser wavelength on the on/off switching behavior of the as-fabricated SnO<sub>2</sub> NPs at -0.4V.

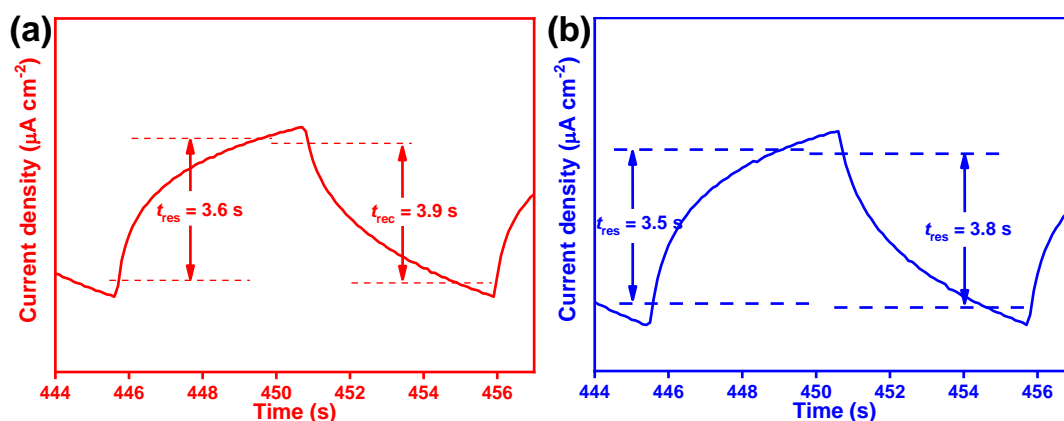

**Figure S2.** The response time and decay time of (a) the as-fabricated SnO<sub>2</sub> NP-2 and (b) SnO<sub>2</sub> NP-3-based electrodes irradiated by SL in 0.05 M KOH.

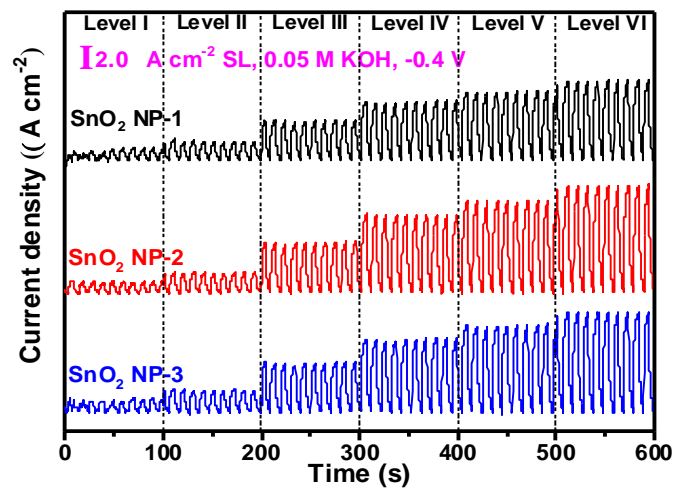

**Figure S3.** Size effect of the SnO<sub>2</sub> NPs with different sizes on the photoresponse behavior at external voltages of -0.4 V under 334 nm laser.

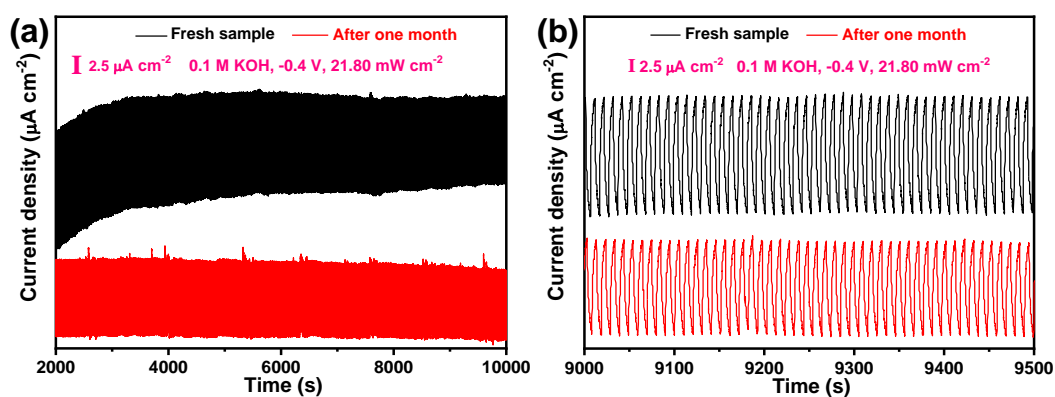

**Figure S4.** (a) Photoresponse stability of the as-prepared SnO<sub>2</sub> NPs-1, and (b) its enlarged area.

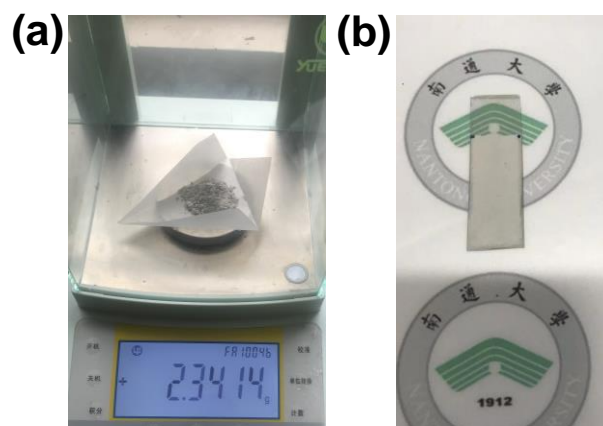

**Figure S5.** The pictures of (a) the as-prepared SnO<sub>2</sub> NP-1 powder and (b) SnO<sub>2</sub> NP-1-based electrode.
